# Supplementary material for: A new insight into the 5-carboxycytosine and 5-formylcytosine under typical bisulfite conditions: a deamination mechanism study
Source: Royal Society of Chemistry journal article supplement (doi:10.1039/c3cp54266a), 2013-12-16
Supplement: c3cp54266a.pdf [file c3cp54266a.pdf]

# Supporting information

-for-

## **A New Insight on the 5-Carboxycytosine and 5-Formylcytosine under Typical Bisulfite Conditions: A Deamination Mechanism Studies**

Lingxia Jin,<sup>a,b</sup> Wenliang Wang<sup>\*,a</sup> Daodao Hu<sup>a</sup> Jian Lü<sup>\*,c</sup>

<sup>a</sup>*Key Laboratory for Macromolecular Science of Shaanxi Province, School of Chemistry and Chemical Engineering, Shaanxi Normal University, Xi'an 710062*

<sup>b</sup>*School of Chemical & Environment Science, Shaanxi University of Technology, Hanzhong, Shaanxi 723001*

<sup>c</sup>*Xi'an Modern Chemistry Research Institute, Xi'an 710065, People's Republic of China*

---

\* Corresponding authors. Tel: +86-29-81530815 Fax: +86-29-81530727; e-mail: [wliwang@snnu.edu.cn](mailto:wliwang@snnu.edu.cn) (W. L. Wang), [lujian204@263.net](mailto:lujian204@263.net) (J. Lü).

## Table and Figure from calculation

### Contents:

Table S1 The Relevant Energy Information (in  $\text{kJ}\cdot\text{mol}^{-1}$ ) of Different 5-caCytN3<sup>+</sup>-SO<sub>3</sub><sup>-</sup> Isomers Both in the Gas and Aqueous Phases

Table S2 Relative Energies (in  $\text{kJ}\cdot\text{mol}^{-1}$ ) for the Hydrolytic Deamination Reaction of Different 5-caCytN3<sup>+</sup>-SO<sub>3</sub><sup>-</sup> Isomers (R1, R2 and R4) and HSO<sub>3</sub><sup>-</sup> group (R1-paths A-B, R2-paths A-B and R4-paths A-B) Both in the Gas and Aqueous Phases

Table S3 The Relevant Information (in  $\text{kJ}\cdot\text{mol}^{-1}$ ) of Different 5-O<sup>+</sup>fCytN3<sup>+</sup>-SO<sub>3</sub><sup>-</sup> Isomers Both in the Gas and Aqueous Phases

Table S4 Relative Energies (in  $\text{kJ}\cdot\text{mol}^{-1}$ ) for the Hydrolytic Deamination Reaction of 5-O<sup>+</sup>fCytN3<sup>+</sup>-SO<sub>3</sub><sup>-</sup> Isomer (R4') and HSO<sub>3</sub><sup>-</sup> group (R4'-paths C-D) Both in the Gas and Aqueous Phases

Table S5 The Chelg Charge on O5 of Reaction Complexes for Path A and Water-mediated Paths Both in the Gas and Aqueous Phases

Fig. S1 Optimized structures of 5-caCytN3<sup>+</sup>-SO<sub>3</sub><sup>-</sup> isomers (R1, R2, R3, and R4) in the aqueous phase are at B3LYP/6-311++G(d,p) level.

Fig. S2 Optimized stationary structures (bond distances in Å) in the aqueous phase for the hydrolytic deamination reaction of 5-caCytN3<sup>+</sup>-SO<sub>3</sub><sup>-</sup> isomer (R3) and HSO<sub>3</sub><sup>-</sup>···H<sub>2</sub>O group (path A—the HSO<sub>3</sub><sup>-</sup> group toward the left side of R3) are at B3LYP/6-311++G(d,p) level.

Fig. S3 Optimized stationary structures (bond distances in Å) in the aqueous phase for the direct hydrolytic deamination reaction of 5-caCytN3<sup>+</sup>-SO<sub>3</sub><sup>-</sup> isomer (R3) and HSO<sub>3</sub><sup>-</sup> group (path B—the HSO<sub>3</sub><sup>-</sup>···H<sub>2</sub>O group toward the right side of R3) are at B3LYP/6-311++G(d,p) level.

Fig. S4 Optimized structures of 5-O<sup>+</sup>fCytN3<sup>+</sup>-SO<sub>3</sub><sup>-</sup> isomers (R1', R2', R3', and R4') in the aqueous phase are at B3LYP/6-311++G(d,p) level.

Fig. S5 Optimized stationary structures (bond distances in Å) in the aqueous phase for the direct hydrolytic deamination reaction of 5-O<sup>+</sup>fCytN3<sup>+</sup>-SO<sub>3</sub><sup>-</sup> isomer (R3') and HSO<sub>3</sub><sup>-</sup> group (path C—the HSO<sub>3</sub><sup>-</sup>···H<sub>2</sub>O group toward the left side of R3') are at B3LYP/6-311++G(d,p) level.

Fig. S6 Optimized stationary structures (bond distances in Å) in the aqueous phase for the direct hydrolytic deamination reaction of 5-O<sup>+</sup>fCytN3<sup>+</sup>-SO<sub>3</sub><sup>-</sup> isomer (R3') and HSO<sub>3</sub><sup>-</sup> group (path D—the HSO<sub>3</sub><sup>-</sup>···H<sub>2</sub>O group toward the right side of R3') are at B3LYP/6-311++G(d,p) level.

Fig. S7 Optimized stationary structures (bond distances in Å) in the aqueous phase for the one water-mediated path A (1w-path A) at B3LYP/6-311++G(d,p) level.

Fig. S8 Optimized stationary structures (bond distances in Å) in the aqueous phase for the two

water-mediated path A (2w-path A) at B3LYP/6-311++G(d,p) level.

Fig. S9 Optimized stationary structures (bond distances in Å) in the aqueous phase for the one water-mediated path C (1w-path C) at B3LYP/6-311++G(d,p) level.

Fig. S10 Optimized stationary structures (bond distances in Å) in the aqueous phase for the two water-mediated path C (2w-path C) at B3LYP/6-311++G(d,p) level.

Table S1 The Relevant Energy Information<sup>a</sup> (in kJ·mol<sup>-1</sup>) of Different 5-caCytN3<sup>+</sup>-SO<sub>3</sub><sup>-</sup> Isomers  
Both in the Gas and Aqueous Phases

| Species | $\Delta E^g$ /(kJ·mol <sup>-1</sup> ) | $\Delta G^g$ /(kJ·mol <sup>-1</sup> ) | $\Delta G^s$ /(kJ·mol <sup>-1</sup> ) |
|---------|---------------------------------------|---------------------------------------|---------------------------------------|
| R1      | 0.00                                  | 0.00                                  | 0.00                                  |
| R2      | 8.69                                  | 8.55                                  | -2.53                                 |
| R3      | 14.77                                 | 14.99                                 | -1.28                                 |
| R4      | 11.12                                 | 12.38                                 | -3.27                                 |

<sup>a</sup>  $\Delta G^g$ , relative free energy in the gas phase;  $\Delta E^g$ , relative free energy in the gas phase;  $\Delta G^s$ , relative free energy in the aqueous phase.

Table S2 Relative Energies <sup>a</sup> (in kJ·mol<sup>-1</sup>) for the Hydrolytic Deamination Reaction of Different 5-caCytN3<sup>+</sup>-SO<sub>3</sub><sup>-</sup> Isomers (R1, R2 and R4) and HSO<sub>3</sub><sup>-</sup> group (R1-paths A-B, R2-paths A-B and R4-paths A-B) Both in the Gas and Aqueous Phases

| System                                               | MP2//B3LYP method <sup>b</sup> |              |                        | PCM <sup>c</sup> |                        |
|------------------------------------------------------|--------------------------------|--------------|------------------------|------------------|------------------------|
|                                                      | $\Delta E^g$                   | $\Delta G^g$ | $\Delta G^{g\ddagger}$ | $\Delta G^s$     | $\Delta G^{s\ddagger}$ |
| R1-path A                                            |                                |              |                        |                  |                        |
| R1+HSO <sub>3</sub> <sup>-</sup> +H <sub>2</sub> O   | 0.00                           | 0.00         | 0.00                   | 0                |                        |
| R1-A-RC                                              | -283.96                        | -201.20      |                        | -34.90           |                        |
| R1-A-TS1                                             | -207.86                        | -112.76      |                        | 63.03            |                        |
| R1-A-IM1                                             | -255.63                        | -160.82      |                        | 12.81            |                        |
| R1-A-TS2                                             | -247.38                        | -150.62      |                        | 27.29            |                        |
| R1-A-IM2                                             | -251.74                        | -156.58      |                        | 20.32            |                        |
| R1-A-TS3                                             | -258.13                        | -163.26      |                        | 7.31             |                        |
| R1-A-IM3                                             | -259.31                        | -165.81      |                        | -1.27            |                        |
| R1-A-TS4                                             | -216.38                        | -125.17      |                        | 47.20            |                        |
| R1-A-P                                               | -295.65                        | -209.99      |                        | -18.75           |                        |
| R1-A-RC→R1-A-IM1                                     |                                |              | 88.44                  |                  | 97.93                  |
| R1-A-IM1→R1-A-IM2                                    |                                |              | 10.2                   |                  | 14.48                  |
| R1-A-IM2→R1-A-IM3                                    |                                |              | -6.68                  |                  | -13.01                 |
| R1-A-IM4→R1-A-P                                      |                                |              | 40.64                  |                  | 48.47                  |
| R1-path B                                            |                                |              |                        |                  |                        |
| R1-R+HSO <sub>3</sub> <sup>-</sup> +H <sub>2</sub> O | 0.00                           | 0.00         |                        | 0.00             |                        |
| R1-B-RC                                              | -282.97                        | -200.12      |                        | -22.04           |                        |
| R1-B-TS1                                             | -209.13                        | -111.44      |                        | 67.93            |                        |
| R1-B-IM1                                             | -246.77                        | -151.12      |                        | 34.95            |                        |
| R1-B-IM2                                             | -238.45                        | -144.80      |                        | 39.09            |                        |
| R1-B-TS2                                             | -125.88                        | -31.06       |                        | 146.49           |                        |
| R1-B-P                                               | -295.68                        | -210.10      |                        | 140.07           |                        |
| R1-B-RC→R1-B-IM1                                     |                                |              | 88.68                  |                  | 89.97                  |
| R1-B-IM2→R1-B-P                                      |                                |              | 113.74                 |                  | 107.4                  |
| R2-path A                                            |                                |              |                        |                  |                        |
| R2+HSO <sub>3</sub> <sup>-</sup> +H <sub>2</sub> O   | 0.00                           | 0.00         |                        | 0.00             |                        |
| R2-A-RC                                              | -314.35                        | -226.28      |                        | -29.24           |                        |
| R2-A-TS1                                             | -213.40                        | -118.80      |                        | 63.22            |                        |
| R2-A-IM1                                             | -275.30                        | -177.05      |                        | 17.61            |                        |
| R2-A-TS2                                             | -248.50                        | -153.40      |                        | 26.97            |                        |
| R2-A-IM2                                             | -252.65                        | -158.59      |                        | 15.34            |                        |
| R2-A-TS3                                             | -257.90                        | -163.51      |                        | 17.15            |                        |
| R2-A-IM3                                             | -255.75                        | -163.01      |                        | 2.57             |                        |
| R2-A-TS4                                             | -245.62                        | -156.93      |                        | 54.74            |                        |
| R2-A-P                                               | -295.20                        | -211.12      |                        | -11.46           |                        |
| R2-A-RC→R2-A-IM1                                     |                                |              | 107.48                 |                  | 92.46                  |
| R2-A-IM1→R2-A-IM2                                    |                                |              | 23.65                  |                  | 9.36                   |
| R2-A-IM2→R2-A-IM3                                    |                                |              | -4.92                  |                  | 1.81                   |
| R2-A-IM4→R2-A-P                                      |                                |              | 6.08                   |                  | 52.17                  |
| R2-path B                                            |                                |              |                        |                  |                        |
| R2+HSO <sub>3</sub> <sup>-</sup> +H <sub>2</sub> O   | 0.00                           | 0.00         |                        | 0.00             |                        |

|                                                    |         |         |        |        |
|----------------------------------------------------|---------|---------|--------|--------|
| R2-B-RC                                            | -318.65 | -227.26 |        | -61.05 |
| R2-B-TS1                                           | -230.32 | -131.72 |        | 36.18  |
| R2-B-IM1                                           | -259.40 | -163.55 |        | 6.08   |
| R2-B-TS2                                           | -256.59 | -160.75 |        | 15.18  |
| R2-B-IM2                                           | -261.78 | -165.33 |        | 8.97   |
| R2-B-TS3                                           | -256.51 | -161.57 |        | 9.106  |
| R2-B-IM3                                           | -259.69 | -163.43 |        | 26.00  |
| R2-B-TS4                                           | -138.42 | -41.43  |        | 112.70 |
| R2-B-P                                             | -322.82 | -234.95 |        | -39.08 |
| R2-B-RC→R2-B-IM1                                   |         |         | 95.54  | 97.23  |
| R2-B-IM1→R2-B-IM2                                  |         |         | 2.80   | 9.10   |
| R2-B-IM2→R2-B-IM3                                  |         |         | 3.76   | 0.14   |
| R2-B-IM3→R2-B-P                                    |         |         | 122.00 | 86.70  |
| R4-path A                                          |         |         |        |        |
| R4+HSO <sub>3</sub> <sup>-</sup> +H <sub>2</sub> O | 0.00    | 0.00    |        | 0.00   |
| R4-A-RC                                            | -283.44 | -200.95 |        | -11.94 |
| R4-A-TS1                                           | -200.84 | -107.84 |        | 71.23  |
| R4-A-IM1                                           | -255.23 | -161.22 |        | 27.33  |
| R4-A-TS2                                           | -256.16 | -160.10 |        | --     |
| R4-A-IM2                                           | -254.07 | -160.01 |        | 3.46   |
| R4-A-TS3                                           | -257.54 | -165.67 |        | 15.43  |
| R4-A-IM3                                           | -260.20 | -168.52 |        | 10.84  |
| R4-A-TS4                                           | -221.86 | -125.16 |        |        |
| R4-A-P                                             | -342.46 | -251.64 |        | -64.80 |
| R4-A-RC→R4-A-IM1                                   |         |         | 93.11  | 83.17  |
| R4-A-IM1→R4-A-IM2                                  |         |         | 1.12   |        |
| R4-A-IM2→R4-A-IM3                                  |         |         | -5.66  | 11.97  |
| R4-A-IM4→R4-A-P                                    |         |         | 43.36  | --     |
| R4-path B                                          |         |         |        |        |
| R4+HSO <sub>3</sub> <sup>-</sup> +H <sub>2</sub> O | 0.00    | 0.00    |        | 0.00   |
| R4-B-RC                                            | -282.39 | -191.16 |        | -43.58 |
| R4-B-TS1                                           | -212.31 | -113.72 |        | 38.30  |
| R4-B-IM1                                           | -271.14 | -176.31 |        | -2.03  |
| R4-B-TS2                                           | -266.29 | -172.17 |        | 7.43   |
| R4-B-IM2                                           | -279.15 | -185.85 |        | -5.10  |
| R4-B-TS3                                           | -149.58 | -53.33  |        | 125.54 |
| R4-B-P                                             | -327.05 | -239.81 |        | -57.75 |
| R4-B-RC→R4-B-IM1                                   |         |         | 77.44  | 81.88  |
| R4-B-IM1→R4-B-IM2                                  |         |         | 4.14   | 9.46   |
| R4-B-IM2→R4-B-P                                    |         |         | 132.52 | 130.64 |

<sup>a</sup>  $\Delta G^g$ , relative free energy in the gas phase;  $\Delta E^g$ , relative free energy in the gas phase;  $\Delta G^{g\ddagger}$ , activation free energy in the gas phase;  $\Delta G^s$ , relative free energy in the aqueous phase;  $\Delta G^{s\ddagger}$ , activation free energy in the aqueous phase.

<sup>b</sup> MP2/6-311++G(3df,3pd)//B3LYP/6-311++G(d,p) level. <sup>c</sup> MP2/6-311++G(3df,3pd)//B3LYP/6-311++G(d,p) with PCM model.

Table S3 The Relevant Information<sup>a</sup> (in  $\text{kJ}\cdot\text{mol}^{-1}$ ) of Different 5-O<sup>+</sup>fCytN3<sup>+</sup>-SO<sub>3</sub><sup>-</sup> Isomers Both in the Gas and Aqueous Phases

| Species | $\Delta E^g / (\text{kJ}\cdot\text{mol}^{-1})$ | $\Delta G^g / (\text{kJ}\cdot\text{mol}^{-1})$ | $\Delta G^s / (\text{kJ}\cdot\text{mol}^{-1})$ |
|---------|------------------------------------------------|------------------------------------------------|------------------------------------------------|
| R1'     | 23.59                                          | 24.17                                          | 25.35                                          |
| R2'     | 28.07                                          | 29.47                                          | 26.94                                          |
| R3'     | 0.00                                           | 0.00                                           | 0.00                                           |
| R4'     | 1.40                                           | 1.48                                           | -2.63                                          |

<sup>a</sup>  $\Delta G^g$ , relative free energy in the gas phase;  $\Delta E^g$ , relative free energy in the gas phase;  $\Delta G^s$ , relative free energy in the aqueous phase.

Table S4 Relative Energies <sup>a</sup> (in kJ·mol<sup>-1</sup>) for the Hydrolytic Deamination Reaction of  
 5-O<sup>+</sup>fCytN3<sup>+</sup>-SO<sub>3</sub><sup>-</sup> Isomer (R4') and HSO<sub>3</sub><sup>-</sup> group (R4'-paths C-D) Both  
 in the Gas and Aqueous Phases

| System                                              | MP2//B3LYP method <sup>b</sup> |              |                        | PCM <sup>c</sup> |                        |
|-----------------------------------------------------|--------------------------------|--------------|------------------------|------------------|------------------------|
|                                                     | $\Delta E^g$                   | $\Delta G^g$ | $\Delta G^{g\ddagger}$ | $\Delta G^s$     | $\Delta G^{s\ddagger}$ |
| R4'-path C                                          |                                |              |                        |                  |                        |
| R4'+HSO <sub>3</sub> <sup>-</sup> +H <sub>2</sub> O | 0.00                           | 0.00         |                        | 0.00             |                        |
| R4'-C-RC                                            | -560.15                        | -474.74      |                        | -20.02           |                        |
| R4'-C-TS1                                           | -497.92                        | -404.03      |                        | 58.18            |                        |
| R4'-C-IM1                                           | -524.96                        | -434.00      |                        | 33.38            |                        |
| R4'-C-TS2                                           | -507.90                        | -416.62      |                        | --               |                        |
| R4'-C-IM2                                           | -521.04                        | -432.60      |                        | 43.73            |                        |
| R4'-C-TS3                                           | -515.56                        | -423.31      |                        | --               |                        |
| R4'-C-IM3                                           | -533.62                        | -443.67      |                        | 29.93            |                        |
| R4'-C-TS4                                           | -422.68                        | -329.58      |                        | 138.04           |                        |
| R4'-C-P                                             | -596.72                        | -510.65      |                        | -35.35           |                        |
| R4'-C-RC→R4'-C-IM1                                  |                                |              | 70.71                  |                  | 78.2                   |
| R4'-C-IM1→R4'-C-IM2                                 |                                |              | 17.38                  |                  |                        |
| R4'-C-IM2→R4'-C-IM3                                 |                                |              | 9.29                   |                  |                        |
| R4'-C-IM4→R4'-C-P                                   |                                |              | 114.09                 |                  | 108.11                 |
| R4'-path D                                          |                                |              |                        |                  |                        |
| R4'+HSO <sub>3</sub> <sup>-</sup> +H <sub>2</sub> O | 0.00                           | 0.00         |                        | 0.00             |                        |
| R4'-D-RC                                            | -567.94                        | -480.13      |                        | -45.59           |                        |
| R4'-D-TS1                                           | -495.38                        | -403.56      |                        | 31.09            |                        |
| R4'-D-IM1                                           | -546.46                        | -450.53      |                        | 11.24            |                        |
| R4'-D-TS2                                           | -535.56                        | -439.43      |                        | 23.06            |                        |
| R4'-D-IM2                                           | -552.37                        | -458.33      |                        | 4.82             |                        |
| R4'-D-TS3                                           | -414.27                        | -318.80      |                        | 120.50           |                        |
| R4'-D-P                                             | -597.20                        | -515.89      |                        | -54.07           |                        |
| R4'-D-RC→R4'-D-IM1                                  |                                |              | 76.57                  |                  | 76.68                  |
| R4'-D-IM1→R4'-D-IM2                                 |                                |              | 11.10                  |                  | 11.82                  |
| R4'-D-IM2→R4'-D- P                                  |                                |              | 139.53                 |                  | 115.68                 |

<sup>a</sup>  $\Delta G^g$ , relative free energy in the gas phase;  $\Delta E^g$ , relative free energy in the gas phase;  $\Delta G^{g\ddagger}$ , activation free energy in the gas phase;  $\Delta G^s$ , relative free energy in the aqueous phase;  $\Delta G^{s\ddagger}$ , activation free energy in the aqueous phase.

<sup>b</sup> MP2/6-311++G(3df,3pd)//B3LYP/ 6-311++G(d,p) level. <sup>c</sup> MP2/6-311++G(3df,3pd)//B3LYP/6-311++G(d,p) with PCM model.



Table S5 The Chelg Charge on O5 of Reaction Complexes for Path A and Water-mediated Paths A Both in the Gas and Aqueous Phases

| path A              | $\rho$  | 1w-path A | $\rho$  | 2w-Path A | $\rho$  |
|---------------------|---------|-----------|---------|-----------|---------|
| A-RC                | -0.7186 | 1w-A-RC   | -0.6778 | 2w-A-RC   | -0.9432 |
| (A-RC) <sup>a</sup> | -0.8427 | (1w-A-RC) | -0.7916 | (2w-A-RC) | -0.9460 |

<sup>a</sup> in brackets Chelg charge on O5 of reaction complexes for path A and water-mediated paths A in the aqueous phase.

As for 5-caCytN3<sup>+</sup>-SO<sub>3</sub><sup>-</sup>, two diastereomers are formed: one has 5-H *trans* to 6-SO<sub>3</sub><sup>-</sup> (*trans* isomer), and another, 5-H *cis* to 6-SO<sub>3</sub><sup>-</sup> (*cis* isomer). The two diastereomers are respectively divided into two isomers based on the torsion and the angles of the OH group in 5-caCytN3<sup>+</sup>-SO<sub>3</sub><sup>-</sup>, denoted as R1, R2, R3, and R4, respectively.

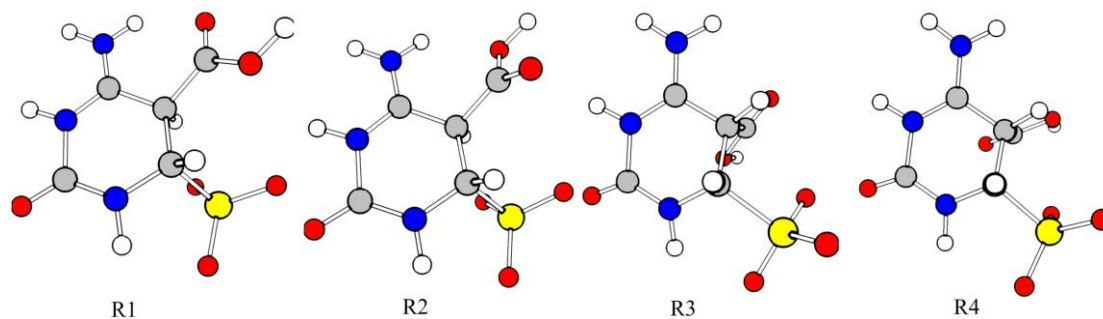

Fig. S1

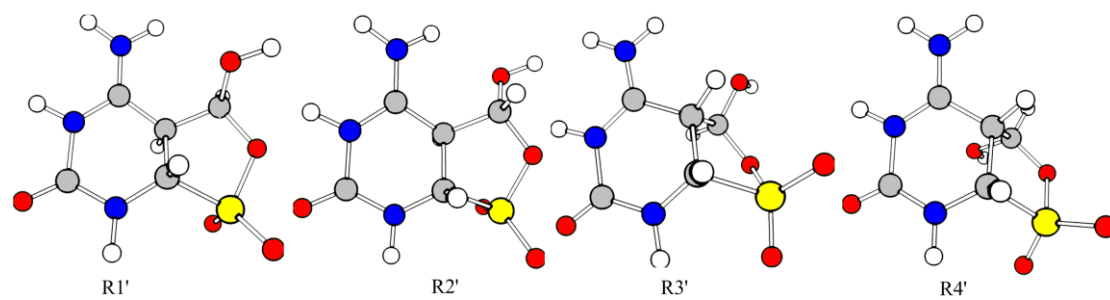

Fig. S2

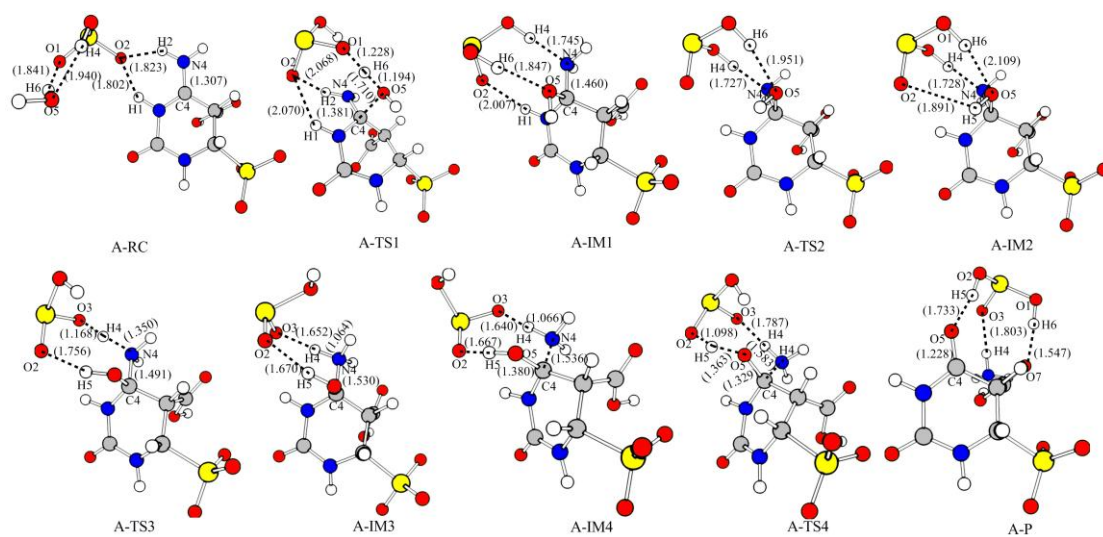

Fig. S3

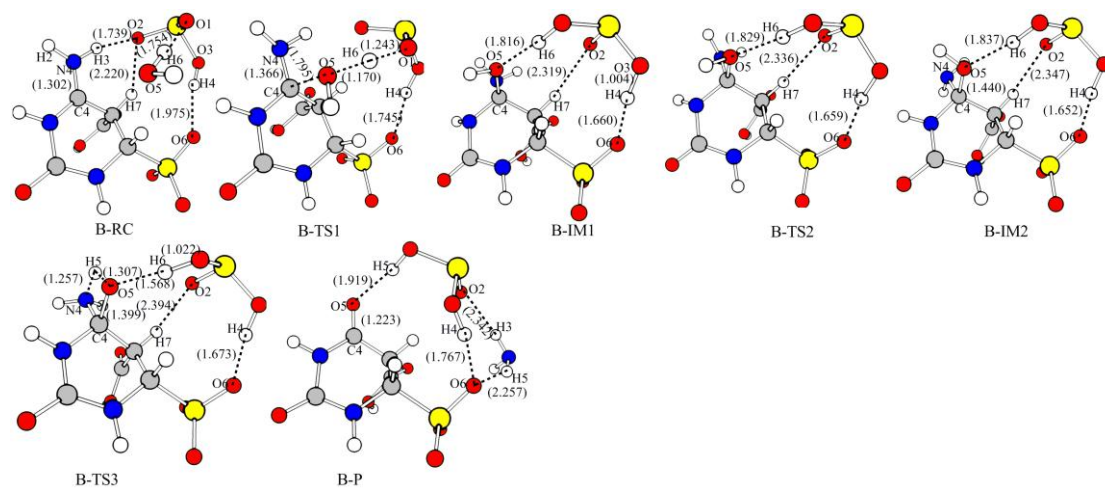

Fig. S4

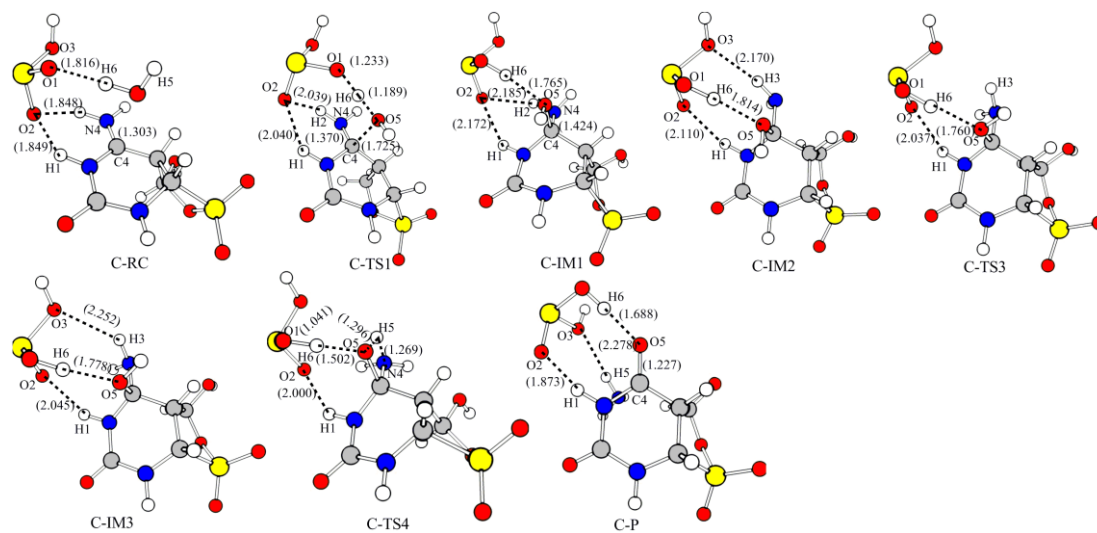

Fig. S5

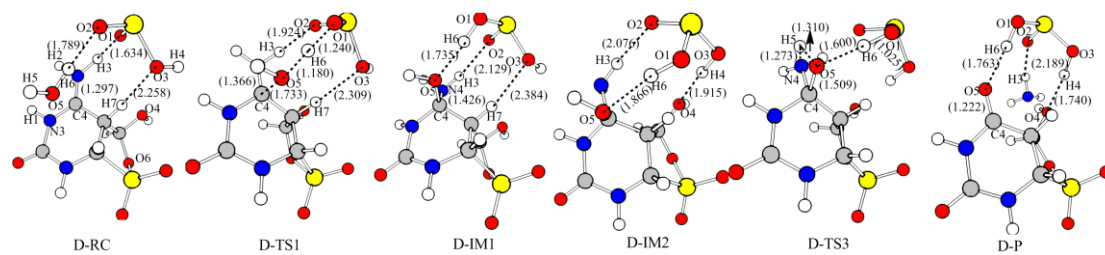

Fig. S6

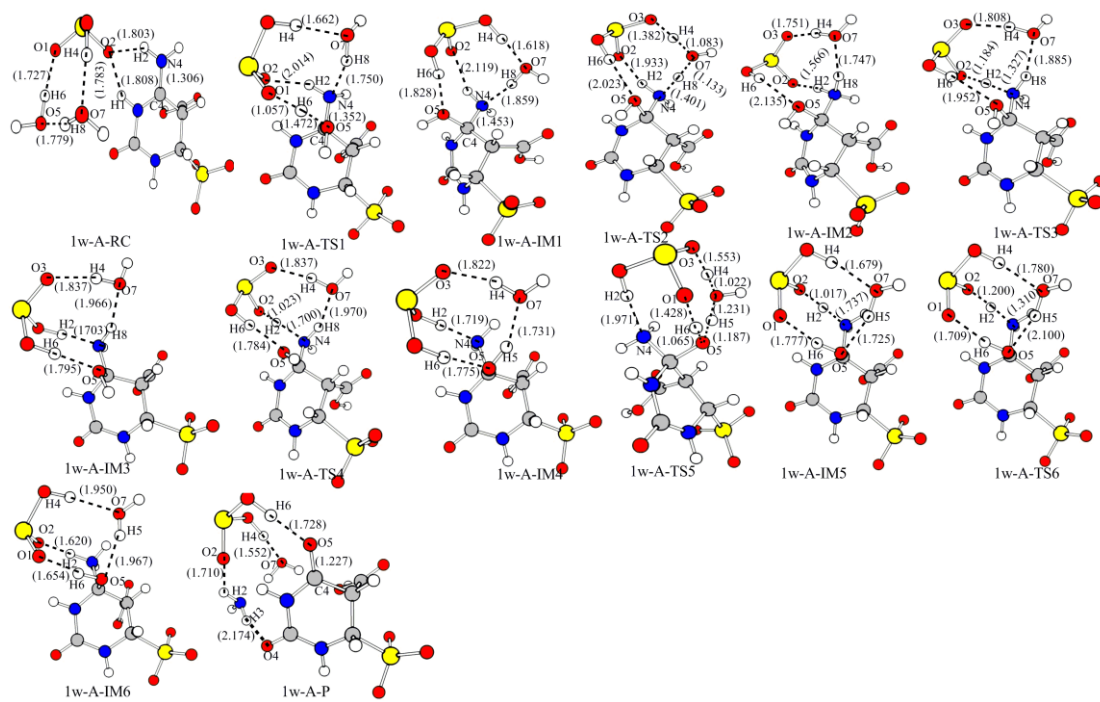

Fig. S7



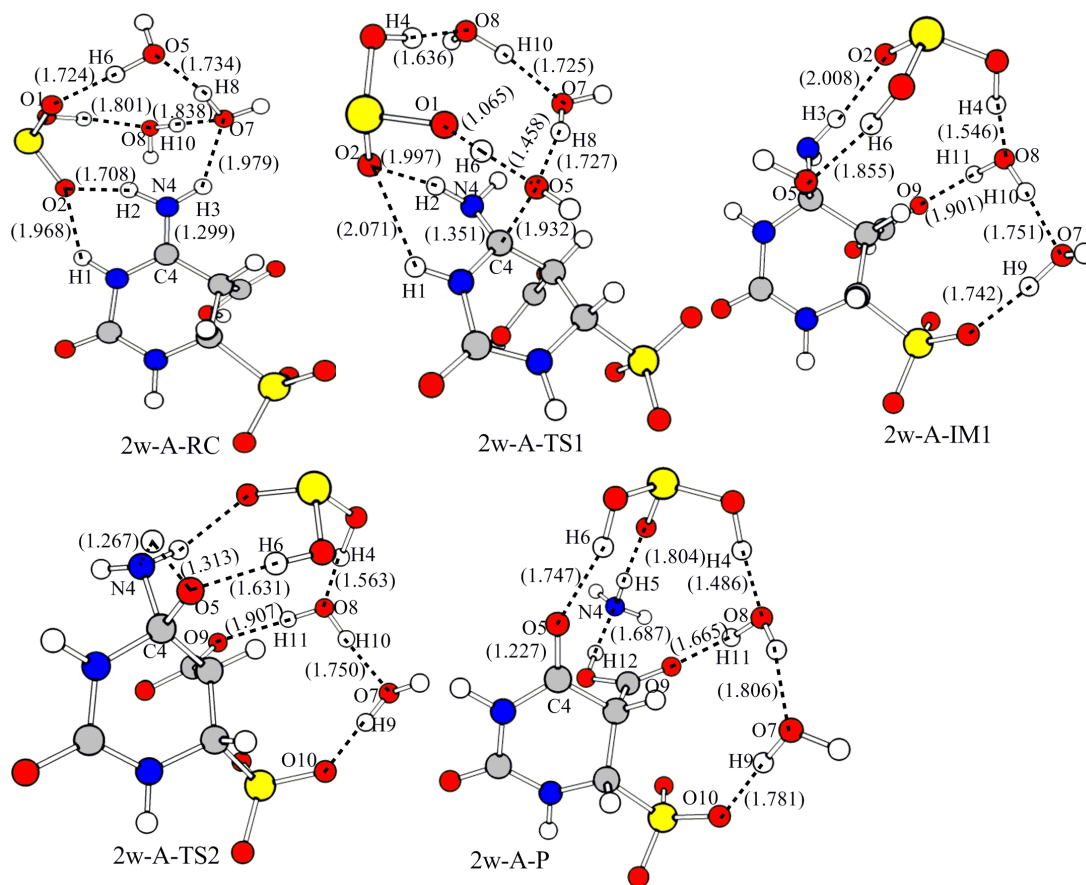

Fig. S8

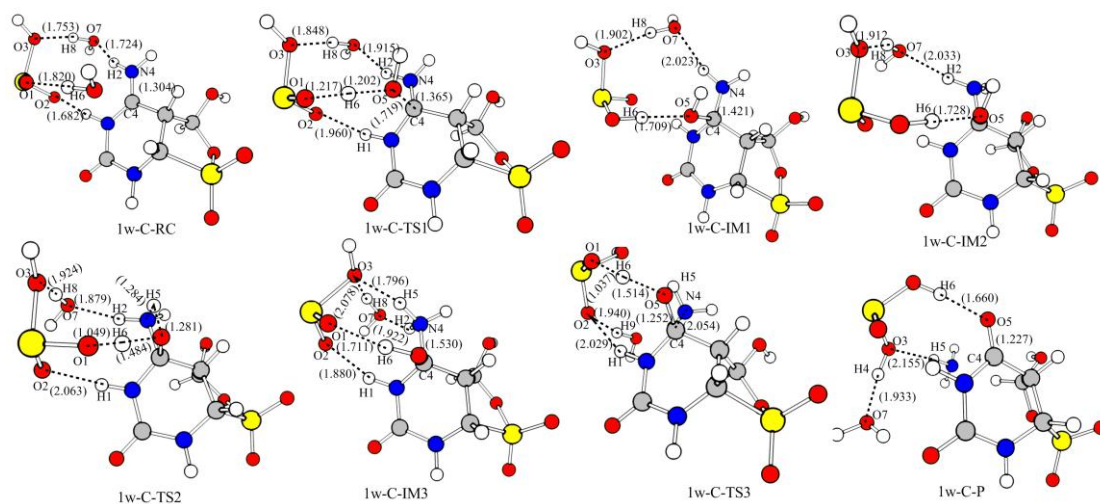

Fig. S9

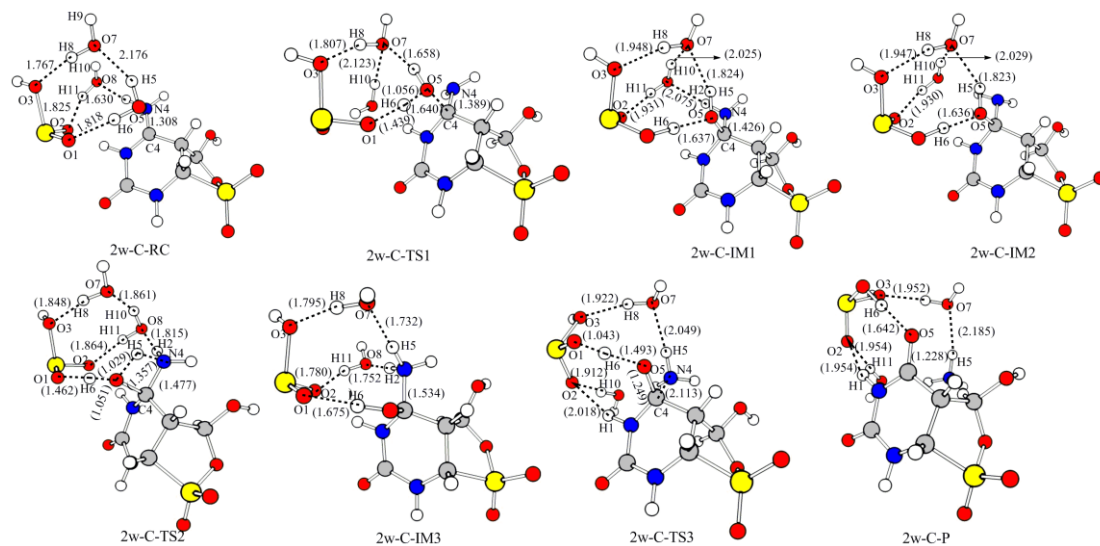

Fig. S10
